# Supplementary material
Source: publisher figshare collection journal article supplement (https://frontiersin.figshare.com/ndownloader/files/25007768)
Supplement: Supplementary file [file 25007768]

**A**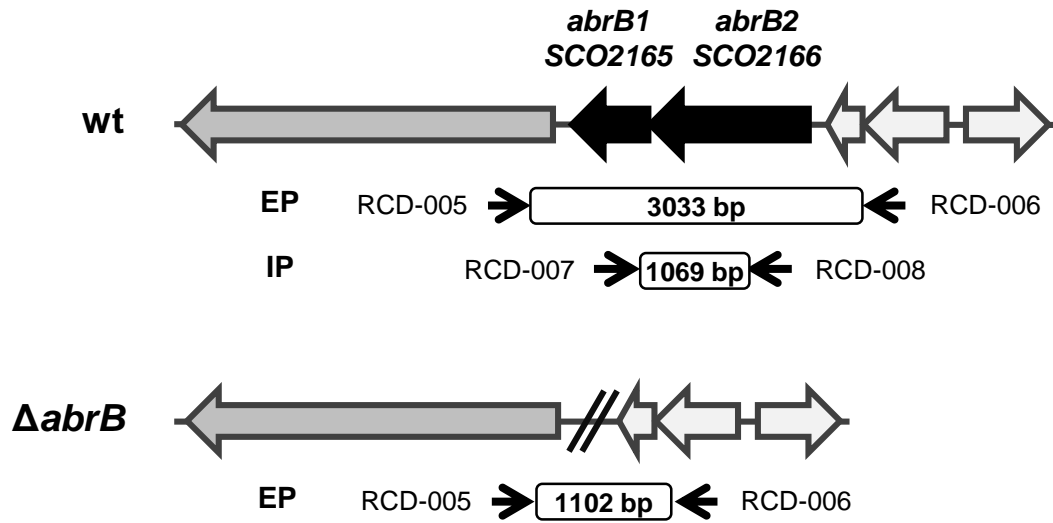**B**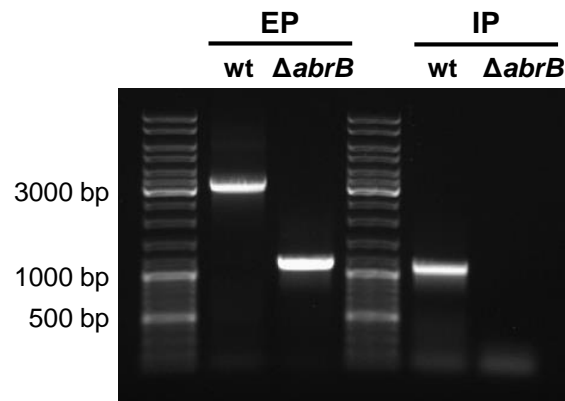

**Figure S1. Checking of the *abrB1/B2* Deletion.**

A) Image of the location of the external and internal primers (EP and IP respectively) in the genome of *S. coelicolor* M145 wt and mutant *ΔabrB* strains. The sizes of the fragments generated by PCR are indicated in each case.

B) PCR fragments obtained using the corresponding EP and IP primers in both strains.
